# Supplementary material for: The major secreted protein of the whipworm parasite tethers to matrix and inhibits interleukin-13 function
Source: PubMed Central journal article supplement (PMC6538607; doi:10.1038/s41467-019-09996-z), 2019-05-28
Supplement: 41467_2019_9996_MOESM1_ESM.pdf [file 41467_2019_9996_MOESM1_ESM.pdf]

1 **Supplementary Data:** The major secreted protein of the  
2 whipworm parasite tethers to matrix and inhibits interleukin-  
3 13 function

4  
5 **Authors:** Allison J Bancroft<sup>1,2,3,4\*</sup>, Colin W Levy<sup>5</sup>, Thomas A Jowitt<sup>2,4</sup>, Kelly S Hayes<sup>1,2,3,4</sup>, Seona  
6 Thompson<sup>1,2,3,4</sup>, Edward A Mckenzie<sup>5</sup>, Matthew D Ball<sup>5</sup>, Eamon Dubaissi<sup>1,2,3,4</sup>, Aidan P France<sup>5</sup>,  
7 Bruno Bellina<sup>5</sup>, Catherine Sharpe<sup>1,2,3,4</sup>, Aleksandr Mironov<sup>4</sup>, Sheila L Brown<sup>1,3,4,6</sup>, Peter C Cook<sup>1,3,4,6</sup>,  
8 Andrew MacDonald<sup>1,3,4, 6</sup>, David J Thornton<sup>1,2,3,4</sup>, and Richard K Grencis<sup>1,2,3,4,\*</sup>

9  
10 \*Corresponding Authors: Allison J Bancroft (allison.j.bancroft@manchester.ac.uk) and  
11 Richard K Grencis (Richard.Grencis@manchester.ac.uk)  
12

13 **Supplementary Figure 1**

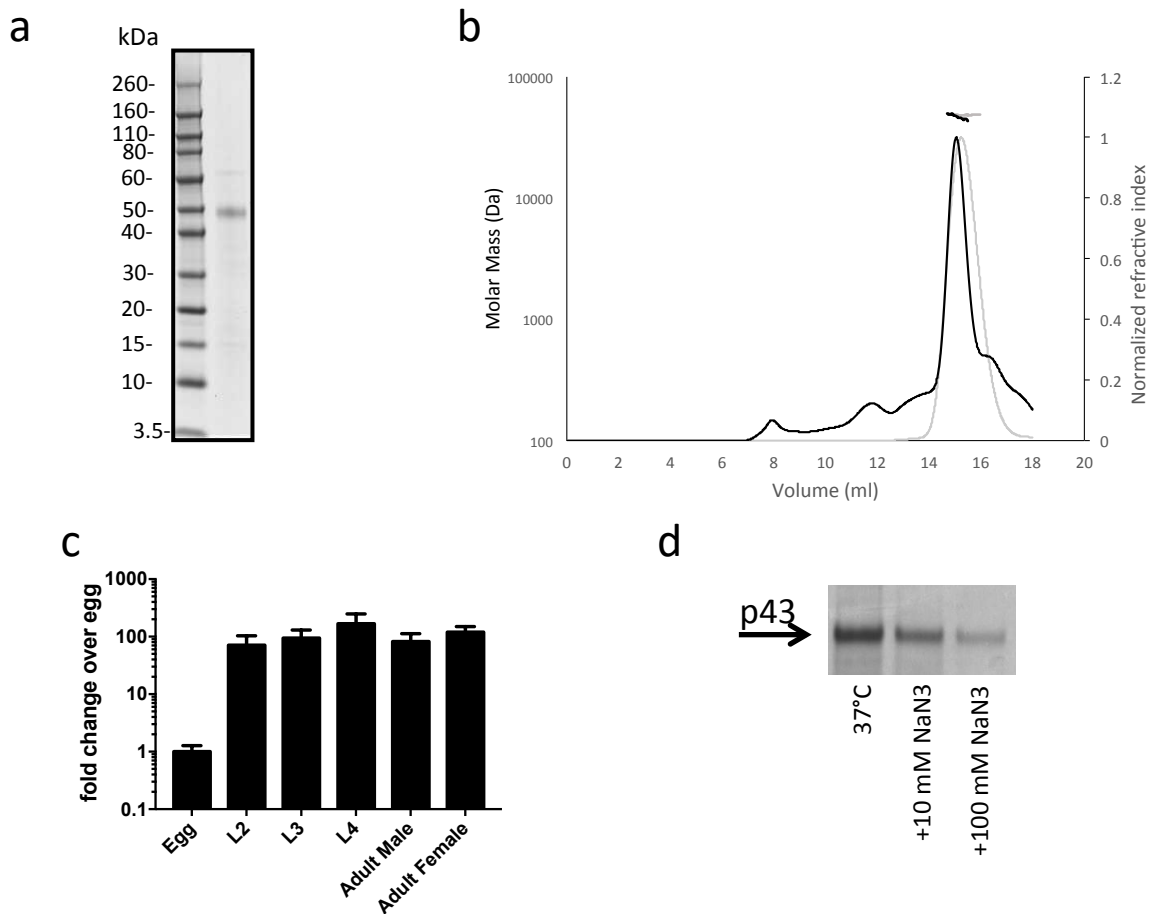

14 **Supplementary Figure 1-The major E/S protein of *T. muris* is a single dominant protein**  
 15 **of approximately 43 kDa. The p43 gene along with myosin is expressed in all life cycle**  
 16 **stages and secretion is reduced by sodium azide.**

18 **a** SDS PAGE of E/S from cultured adult *T. muris* worms. **b** Multi angle light scattering  
 19 (MALS) of native whole E/S from adult *T. muris* (black trace) and native purified p43 (grey  
 20 trace) revealing a major protein of 46.9 kDa and 48.54 kDa respectively. The graph shows  
 21 the refractive index and is a measure of all soluble material eluted from the column. The  
 22 lines above the peak are the mass across the peak. **c** qPCR of p43 in all life cycle stages  
 23 normalized to 18s RNA and referenced to egg/L1. Error bars are SEM of 3 biological  
 24 replicates and the data were analyzed by Kruskal-Wallis with Dunns multiple comparison  
 25 test. **d** 10 adult female and 15 male *T. muris* worms were cultured and 10  $\mu$ l of culture  
 26 medium was run on a 4-12% SDS PAGE. The MALS shown in **b** and the sodium azide  
 27 experiment in **d** are representative of at least 3 independent experiments. qPCR shows 3  
 28 biological and 3 technical replicates, error bars are standard error. Uncropped gels from this  
 29 figure a & d are shown in Supplementary Figure 11.

30

31 **Supplementary Figure 2a**

32 ATGGTAGCAATGCTTGTGCTCTTCTTTCCGCTACTGCTGACGGTTGGCCTGTCCAC  
33 CGCTGGTCACGTA AAAATGTCCGGACTTCGGCGACTGGAAACCATGGACCGACTG  
34 CCTTTGGTATCCGCCGCAACACATGTA CTGAAACTGTCGCACGCCTGCGGCATG  
35 CACGCCACCGCAACCTAACCGGCGTCATGGATCTGCCGCACGGACACAAGACA  
36 CCACCGCCGTGCGGTCA TTGCAGTTTTAAATTCCGATGCCGCCGAAGGCCCAACA  
37 CTGAGGGCTGCTACCCGCTCGACGGCGAAGTGGAGGTGTGCCACGATCACAGCG  
38 ACATCTGCACGCTGCCCAAGTTGCCTCACCTGGGCTGCGGCTACGCTTTCATTAA  
39 CGAAAAATTGAAGCAATGCTTCACTCGACCCGACACGCCCTCGTACGTACGCCTC  
40 GGATACCGAAAGATGTTTCGAAAGCATCCCCAAAAGCACTGTATCGAGAAAGAT  
41 GGAATGTGCAAGTGTTGTTGCGGTGACTACGAACCGAACGAGTCGGGCACCGAA  
42 TGCATCAAACCGCCGGCGCACGACTGTCCCGCCTATGGACCACCGAGCGAATGG  
43 AGCGAGTGCCTGTGGTTCCCGTTGAAGA ACATTGT CAGCCACGTCTACGACCATT  
44 GTCACGTTCA CAAGGAACCCGACGGCTACGAACCGCACAGCGTTGCCCCGGCCA  
45 ACGTGCACATCCCGGAGAAGTGCGGCTTCTGCAGCTTCCGCGTCAAGTGCATGA  
46 AGCGAGACAAGAAGGACGGATGCTTCCCCCTGAAATTGGGCAAGAAGAGTTGCG  
47 GCAAGGACGACTGCCCAACCTGCGGTGACATTTGCACGCTGGACAAGATCAACG  
48 GATCGTGCGCTTTC CCGCGCGTCA TGAAGGAGAAAATCTGGGACGACTTCACCG  
49 CCACCAGCAAGGAGAAGCATATGCCTCATTGGAAGCGCGACGGATACGCCAAAA  
50 TGCTAATGCAACTTCCCTACAGCAATTGCAAAGAGGTTCGGCGACAAGTGCAAAT  
51 GCTGCTGCCATCCGTACGAGCCGAACAAGGACGGCACCGCCTGCGTTGTCAAGG  
52 AATACTGCAAGCGAGTGCACGAGCTGCACCACCACGATCACCACGGCCACGGA  
53 GAGGAGCACCACAAGAGCAGCAGCAGCGAAAGCAAGGAGCACCACCACCACTG  
54 A

55  
56 **b**

57 MVAMLVLFPLLLTVGLSTAGHVKCPDFGDWKPWTDCLWYPPQHMYSKLSHACG  
58 MHAHRNLTGVMDLPHGHKTPPPCGHCSFKFRRRPNTEGCYPLDGEVEVCHDHS  
59 ICTLPKLPHLGCGYAFINEK LKQCFTRPDTPSYVRLGYRKMFE SIPKKHCIEKDG MCK  
60 CCCGDYEPNESGTECIKPPAHD CPA YGPPSEWSECLWFPLKNIVSHVYDHCHVHKEP  
61 DGYEPHSVAPANVHIPEKCGFCSFRVKCMKRDKKDGCFPLKLGKKSCGKDDCPTCG  
62 DICTLDKINGS CAFPRVMKEKIWDDFTATSKEKHMPHWKRDGYAKMLMQLPYSNC  
63 KEVGDKCKCCCHPYEPNKDGTACVVKEYCKRVHELHHHDHGHGEEHHKSSSES  
64 KEHHHH

65  
66  
67  
68  
69 **Supplementary Figure 2-Nucleotide and amino acid sequence of TMUE\_ 3000012139.**

70 **a** The nucleotide sequence of p43. **b** Amino acid sequence of *T. muris* p43 that shows a poly  
71 cysteine, histidine tailed protein.

72  
73

74 **Supplementary Figure 3**

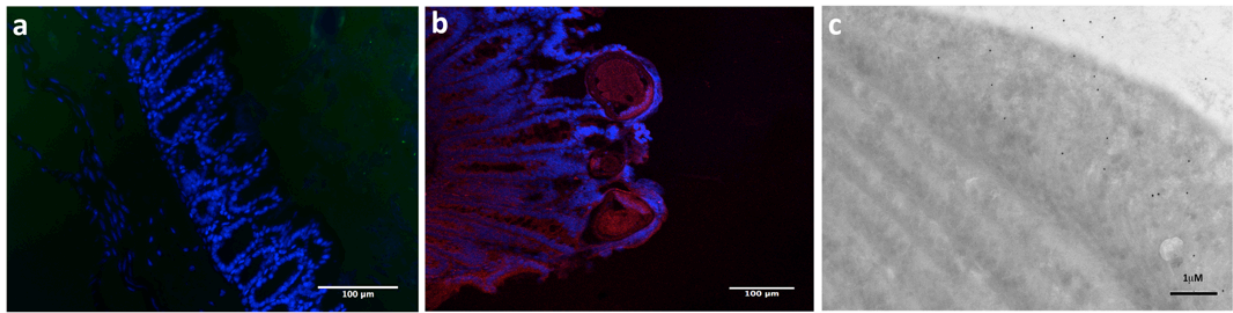

78 **Supplementary Figure 3-Anti-p43 antibody and probes are highly specific.**

79 **a** Control immuno staining from Figure 1b-d where pre-immunization serum was used as the  
80 primary antibody. **b** Control FISH staining from Figure 1e using the sense probe. **c** Control  
81 immuno EM from Figure 1 f & g where secondary antibody only was used.

82  
83  
84

### Supplementary Figure 4

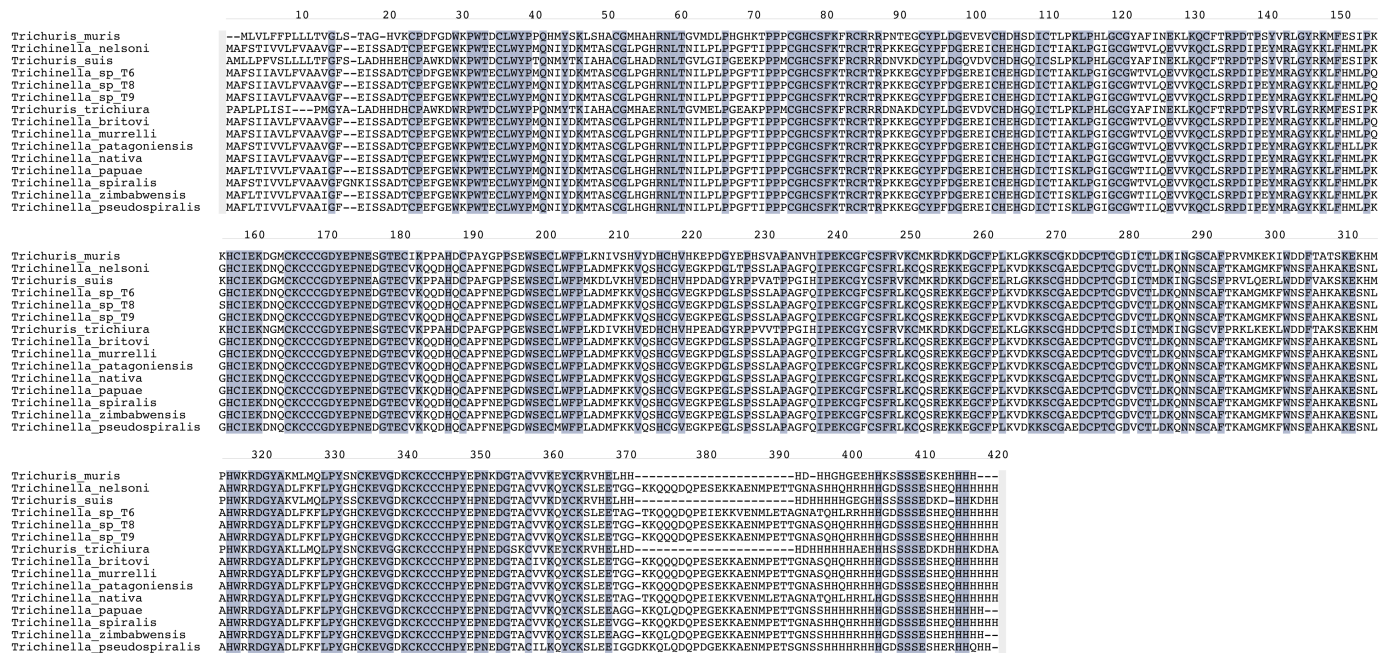

87  
88  
89  
90  
91  
92  
93  
94  
95  
96  
97  
98  
99  
100  
101  
102  
103  
104

### Supplementary Figure 4-TMUE\_3000012139 nucleotide sequence is specific to *Trichuris* species and the closely related *Trichinella* species.

The p43 gene is restricted to Clade I nematodes<sup>1</sup> predominantly *Trichuris spp* and the closely related *Trichinella spp*. The grey shaded areas show where there is 100% conservation across the alignment and show a high degree of sequence conservation is observed across the available species. The numbering above the sequence is that of the *T. muris* sequence. The alignment matrix blosum62<sup>2</sup> was implemented as in ICM-Pro. T6, T8 and T9 refer to isolates from grizzly bear, lion and raccoon dog as detailed in <sup>3</sup>

105 **Supplementary Figure 5**  
106  
107

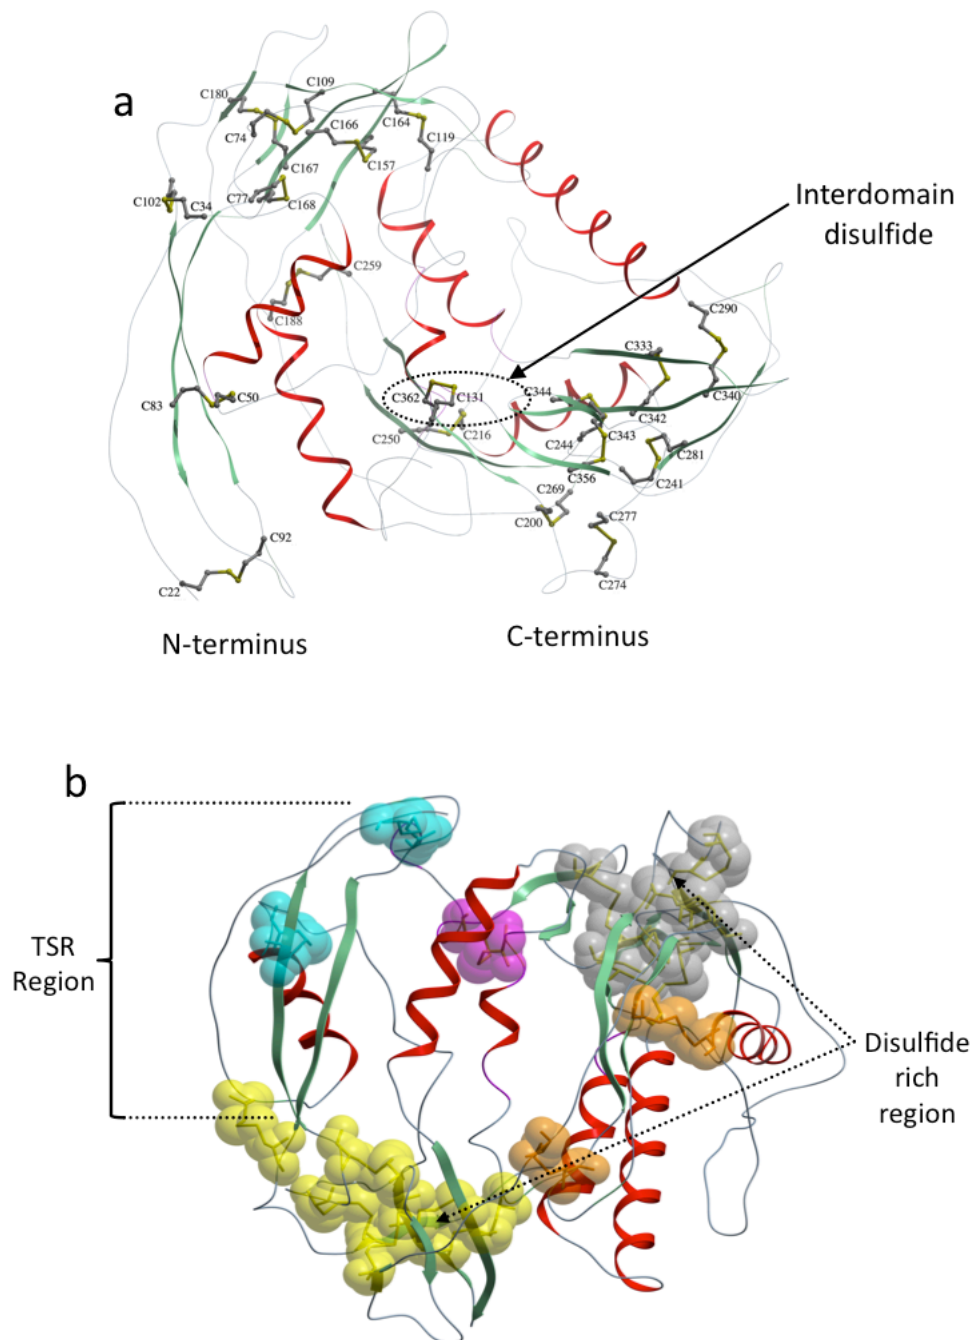

108  
109  
110 **Supplementary Figure 5-The crystal structure of p43 shows interdomain disulfide**  
111 **bonds and a TSR-1 domain.**  
112 **a** A ribbon structure of p43 revealing an interdomain disulfide bond. **b** Position of the  
113 functional TSR-1 domain and disulfide rich regions.  
114  
115  
116

117 **Supplementary Figure 6**

118

119

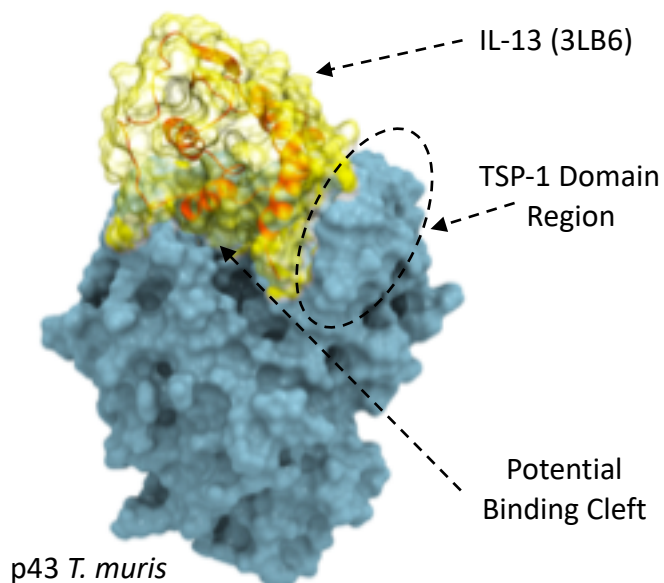

120

121

122

123

124

125

126

127 **Supplementary Figure 6- Fast Fourier Transform (FFT) Protein-Protein docking**

128 **simulation between *T. muris* p43 and IL-13.** The simulation was performed by firstly

129 extracting the coordinates of IL-13 from the deposited crystal structure of IL-13 in complex

130 with IL-13Ralpha2 (3LB6). p43 was then selected as the receptor whilst IL-13 was defined as

131 the ligand before running a global docking simulation allowing for all possible interactions

132 between the two proteins to be explored. The docked IL13 is shown in both ribbon

133 representation (red) and a semi-transparent surface representation (yellow) occupying a deep

134 cleft in the surface of p43 with close contact to the TSP-1 domain region. p43 is shown in

135 surface representation (blue) with contact patches to IL-13 coloured grey. The docking

136 procedure resulted in several alternative poses for potential IL-13 binding and experimental

137 efforts to validate the docking results presented here are ongoing. The docking simulation

138 was performed using the FFT procedure as implemented in ICM-Pro

139 ([http://www.molsoft.com/icm\\_pro.html](http://www.molsoft.com/icm_pro.html)).

140

141 **Supplementary Figure 7**

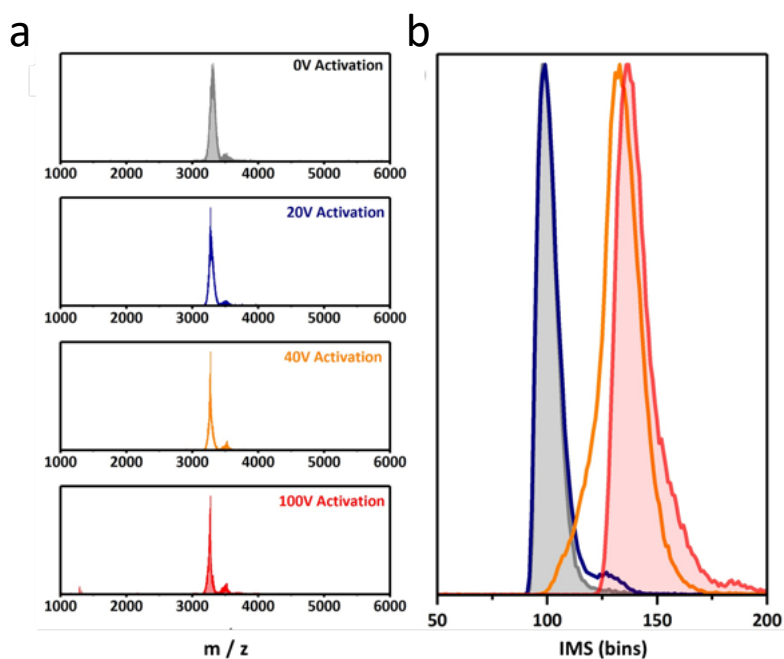

142  
143

144 **Supplementary 7-Mass spectra of the mass selected p43 14<sup>+</sup> ion subjected to different**  
145 **trap collision energies.**

146 **a** p43 is not particularly prone to fragmentation as there are barely detectable fragments post  
147 activation even up to a collision energy of 100 V. **b** Corresponding ion mobility, arrival time  
148 distribution (ATD) profiles for the collisional activation of p43 (14<sup>+</sup> ion) at 0V (grey), 20V  
149 (blue), 40V (orange) and 100V (red). These experiments show that p43 is fairly flexible *in*  
150 *vacuo* and can undergo at least one large conformational change upon activation.

151  
152



153 **Supplementary Figure 8**

154

155

156

157

158

159

160

161

162

163

164

165

166

167

168

169

170

171

172

173

174

175

176

177

178

179

180

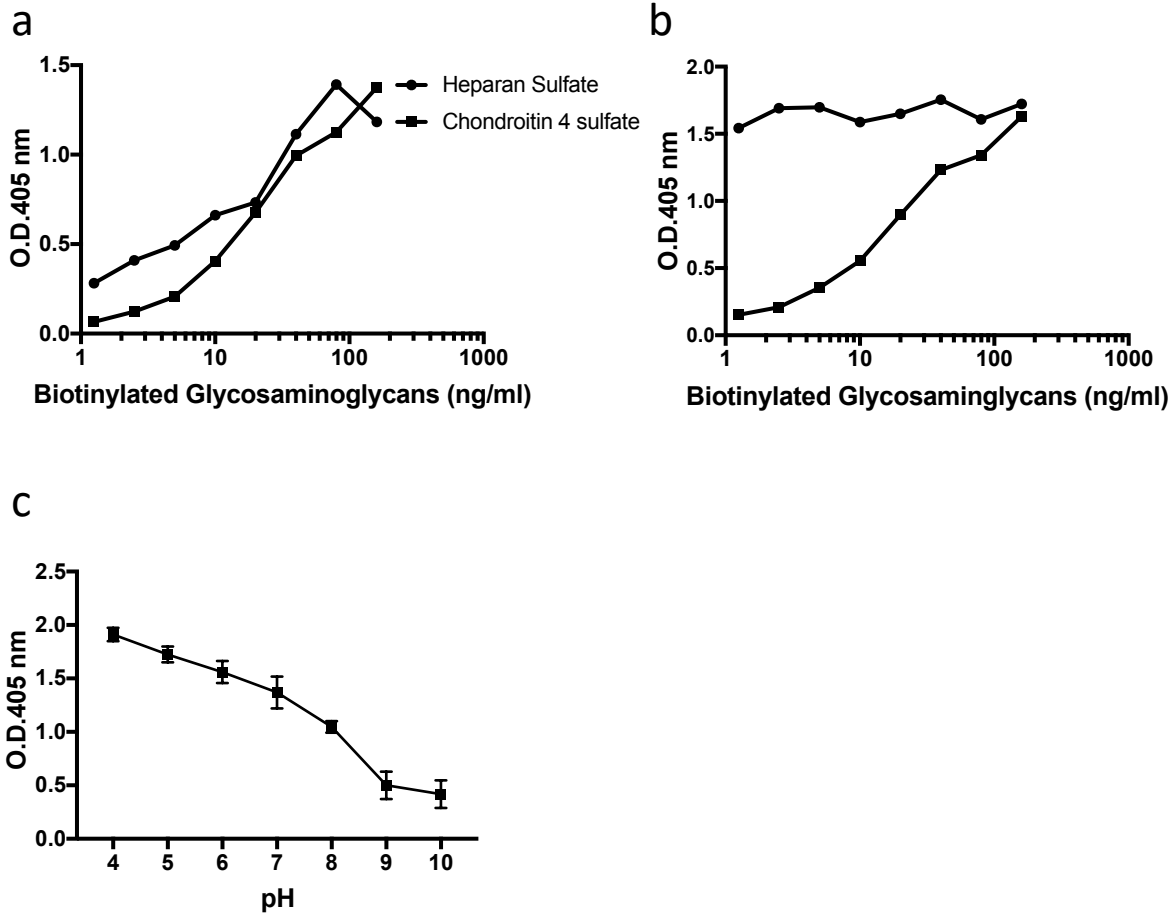

181 **Supplementary Figure 8-p43 and r43 bind to heparan sulfate (HS) by ELISA over a**

182 **wide pH range.**

183 **a & b.** Both native p43, **a** and recombinant r43, **b** bind well to biotinylated

184 glycosaminoglycans, heparan sulfate (HS) and chondroitin 4 sulfate. **c** r43 binds to

185 biotinylated HS over a wide pH range between pH4-7 dropping gradually between pH7-10.

186 These data are representative of at least 3 independent experiments.

187

188

189

190 **Supplementary Figure 9**  
 191  
 192

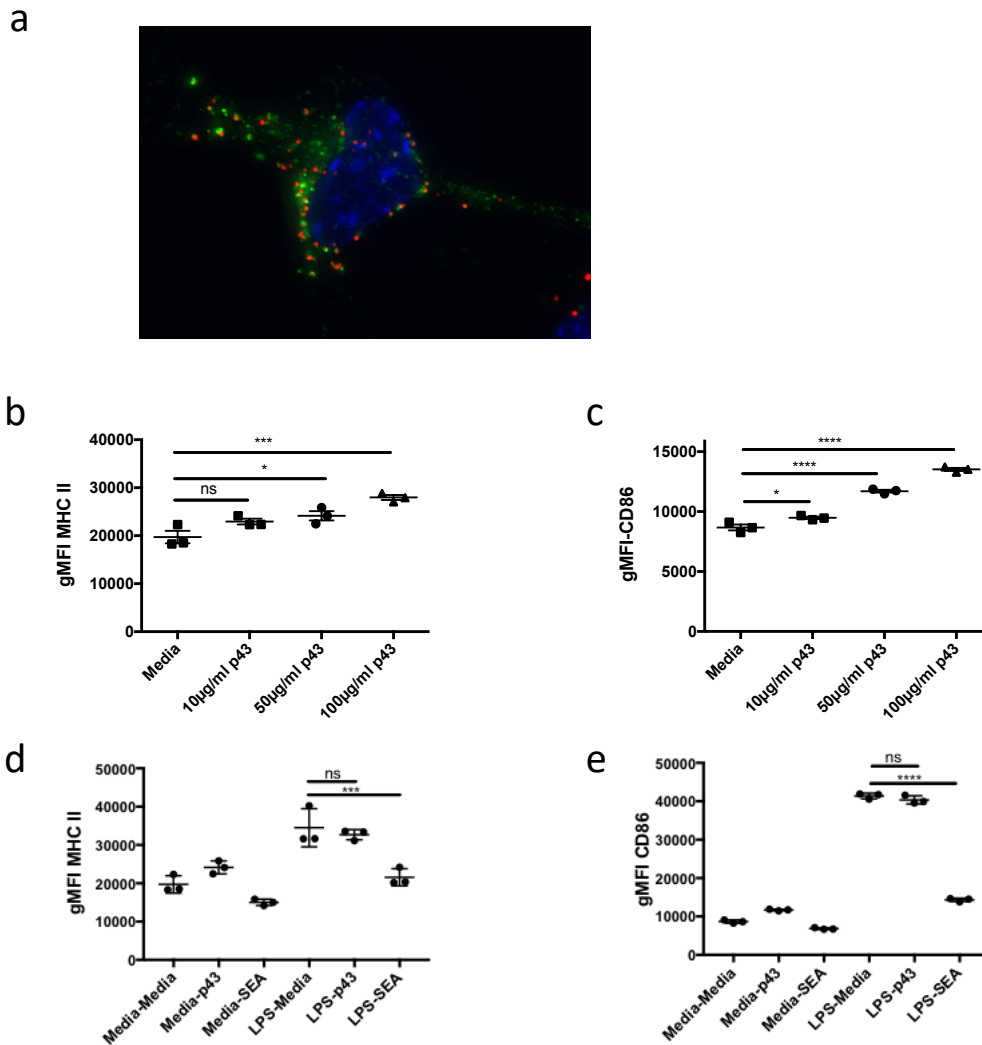

193  
 194  
 195  
 196  
 197  
 198  
 199  
 200  
 201  
 202  
 203  
 204  
 205  
 206  
 207

**Supplementary Figure 9-p43 can enter dendritic cells and co localize with MHC II. It can activate both MHC II and CD86 in a dose dependent manner.**

**a** Bone marrow derived dendritic cells (BMDDC) incubated with Cy3 labeled p43 (red) and stained with H2\_M Alexa Fluor 488 (green). **b & c** BMDDC cultured with different doses of p43 and stained for flow cytometry. CD11C+ cells were stained for **b** MHC II and **c** CD86. **d & e** BMDDC cultured with media and lipopolysaccharide (LPS) and stimulated with p43 or *Schistosoma mansoni* egg antigen (SEA), **d** MHC II and **e** CD86. A one way ANOVA was used to analyse the data, **b** F=14.23, DF=8, Media vs 50µg/ml p43\* p 0.0347; media vs 100µg/ml \*\*\*p 0.0009; **c** F=192.9, DF=8, media vs 10µg/ml \*p 0.0285, media vs 50µg/ml & media vs 100 µg/ml\*\*\*\*p<0.0001; ns=not significant; **d** F=25.75, DF=12, LPS-Media vs LPS-p43=not significant(ns)., LPS-Media vs LPS-SEA \*\*\*p 0.0006; **e**, F=2131, DF=12, LPS-Media vs LPS-p43 ns, LPS-Media vs LPS-SEA \*\*\*\*p<0.0001.

208 **Supplementary Table 1**

209

| Identified Proteins (10/497)                       | MW      | 210         |               |
|----------------------------------------------------|---------|-------------|---------------|
|                                                    |         | Cecal Mucus | Colonic Mucus |
| 1 poly cysteine and histidine tailed protein (p43) | 43 kDa  | 9           | 2             |
| 2 retrovirus_Pol_polyprotein                       | 151 kDa | 2           | 0             |
| 3 Gag_Pol_polyprotein                              | 179 kDa | 0           | 5             |
| 4 DNA_polymerase_subunit_gamma                     | 136 kDa | 2           | 0             |
| 5 DNA_polymerase_zeta_catalytic_subunit            | 173 kDa | 3           | 0             |
| 6 Gag_Pol_polyprotein                              | 148 kDa | 0           | 0             |
| 7 copia_type_pol_polyprotein                       | 18 kDa  | 2           | 0             |
| 8 mediator_of_RNA_polymerase_II                    | 164 kDa | 0           | 2             |
| 9 polymerase_(RNA)_II_(DNA_directed)_polypeptide   | 134 kDa | 0           | 2             |
| 10 gag_pol_polyprotein                             | 123 kDa | 0           | 3             |

222

223

224 **Supplementary Table 1-List of the top 10 proteins identified in infected intestinal mucus**

225 **samples during chronic *T. muris* infection.** The list is compiled of the top 10 proteins identified  
 226 from two independent experiments by tandem mass spectrometry analysis of pooled cecal and colonic  
 227 mucus samples (n=5 per group) from chronically infected C57BL/6 mice. The numbers in the cecal  
 228 mucus and colonic mucus columns represents the number of unique peptides identified. The mucus  
 229 extraction was carried out by PBS and 2M urea incubations (cecum) or flushes (colon), and both  
 230 flushes were analyzed separately by tandem mass spectrometry analysis before combining (as shown  
 231 in the table). The top 10 proteins identified by tandem mass spectrometry is based on the number of  
 232 peptides resolved from the experiment and are displayed in the table. Tandem mass spectrometry data  
 233 were searched against an in house *T. muris* database, using the Mascot search engine. Scaffold  
 234 proteome software was used to validate data, using the parameters; 80% protein threshold, 50%  
 235 peptide threshold and a minimum of 2 unique peptides were required to identify proteins. MW=  
 236 molecular weight.

237

238

239

240

241

242

243

244 **Supplementary Figure 10**  
 245

a Representative sample of Lung cells

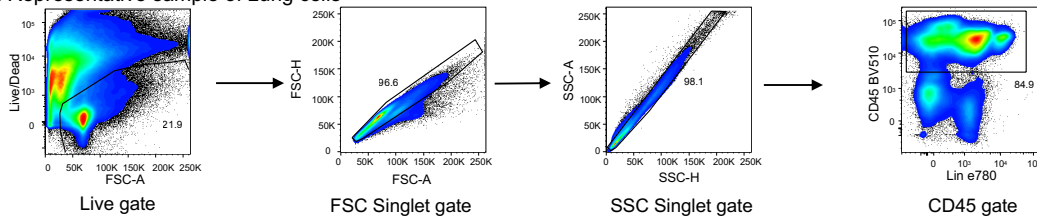

b Representative sample of macrophage gating of BAL -Samples were pre gated on live, single, CD45+ cells

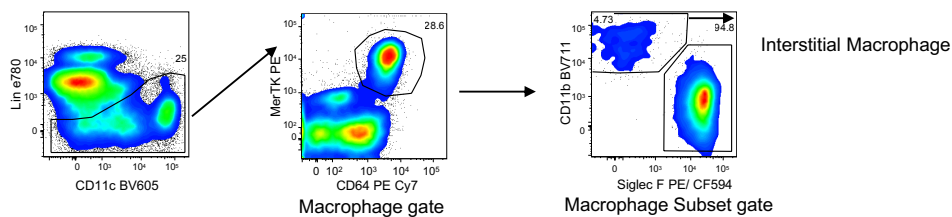

c Representative sample of Interstitial Macrophage Relm $\alpha$ + staining

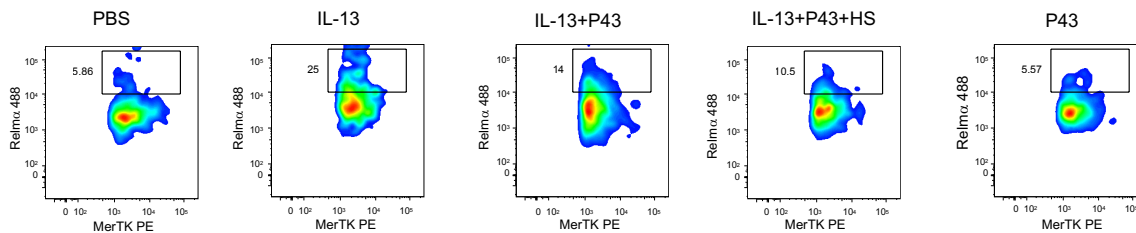

246  
 247

248 **Supplementary Figure 10-Gating Strategy for Interstitial Relm  $\alpha$ + macrophages from**  
 249 **Figure 3h. a** To identify lung macrophages, flow cytometry analysis of single cell  
 250 suspensions from digested lung tissue were analysed to remove dead, doublets and CD45-  
 251 events, and defined as lineage (Lin; CD3,CD19, NK1.1, Ly6G, Ter119)-CD64+MerTK+.  
 252 Interstitial macrophages were identified as Lin-CD64+MerTK+SiglecF-CD11b+. **c**  
 253 Examples of Relm $\alpha$  staining of interstitial macrophages from treated mice are shown.  
 254

255 **Supplementary Figure 11**

256  
257  
258  
259  
260  
261  
262  
263  
264  
265  
266  
267  
268  
269  
270  
271  
272  
273  
274  
275  
276  
277

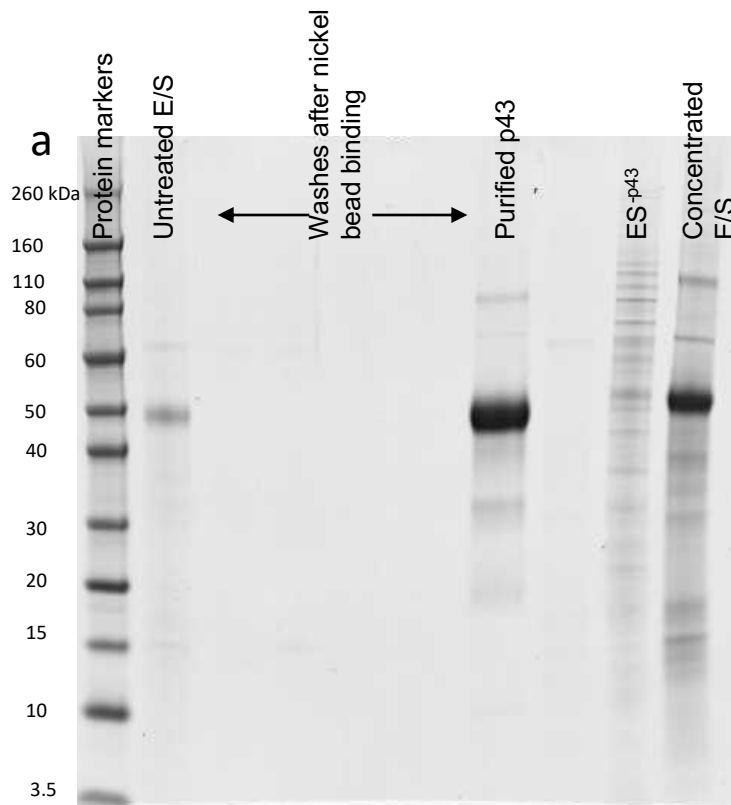

278  
279  
280  
281  
282  
283  
284  
285  
286  
287  
288  
289  
290  
291  
292  
293  
294  
295  
296  
297  
298  
299  
300

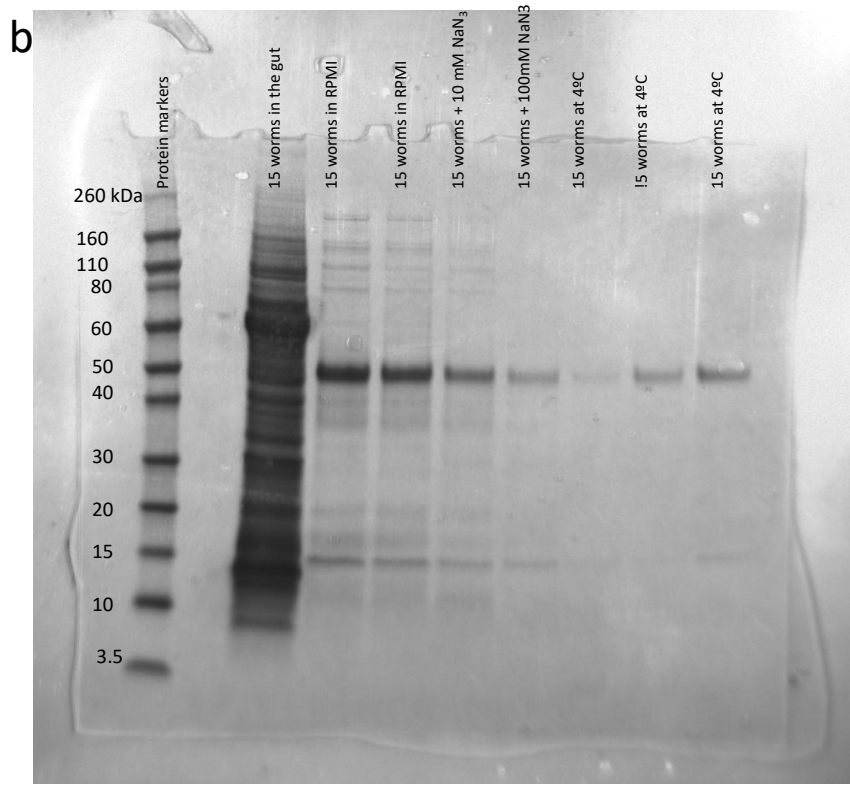

301 **Supplementary Figure 11-SDS PAGE from Supplementary Figure 1a and 1d.** SDS  
302 PAGE of uncropped SDS PAGE from Supplementary Figure 1 showing **a** that p43 is the  
303 single most abundant protein in *T. muris* E/S and **b** that secretion of p43 is inhibited by  
304 increasing concentrations of sodium azide.

305  
 306 **Supplementary Figure 12**

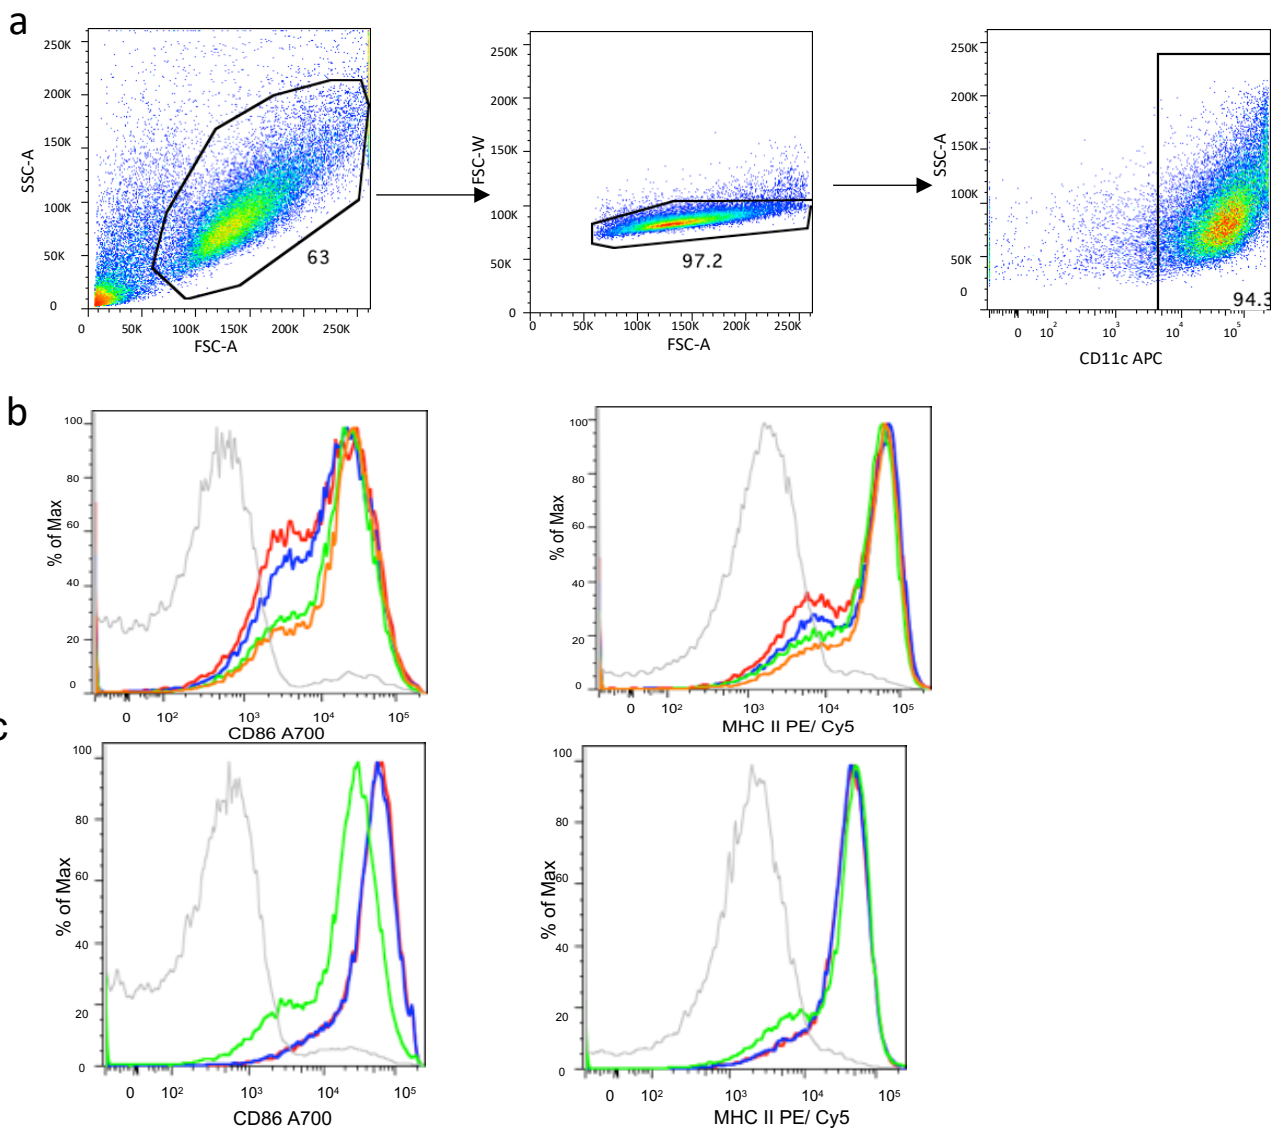

341 **Supplementary Figure 12-Gating strategy for Supplementary Figure 9.** **a** Strategy to  
 342 define CD11c+ BMDCs that were used in the experiments for Supplementary Figure 9 **b-e**.  
 343 **b** relates to Supplementary Figure 9 **b-c**, overlay plots show expression of CD86 and MHC II  
 344 on CD11c+ BMDC, grey line: fluorescence minus control, red line: media, blue line: 10  
 345  $\mu\text{g/ml}$  p43, green line: 50  $\mu\text{g/ml}$  p43, orange line: 100  $\mu\text{g/ml}$  p43. **c** relates to  
 346 Supplementary Figure 9 **d-e** overlay plots show expression of CD86 and MHC II on CD11c+  
 347 BMDC, grey line: fluorescence minus control, red line: LPS alone, blue line: LPS  $\pm$  50  $\mu\text{g/ml}$   
 348 p43, green line: LPS  $\pm$  25  $\mu\text{g/ml}$  SEA.

349  
 350

351 **Supplementary Table 2 for PDB ID 6QIX**

352

|                                       | p43                                  |
|---------------------------------------|--------------------------------------|
| <b>Wavelength</b>                     | 0.92                                 |
| <b>Resolution range</b>               | 57.34 - 1.65 (1.709 - 1.65)          |
| <b>Space group</b>                    | P 1 21 1                             |
| <b>Unit cell</b>                      | 47.6817 164.834 61.1689 90 110.37 90 |
| <b>Total reflections</b>              | 899700 (86471)                       |
| <b>Unique reflections</b>             | 103460 (9969)                        |
| <b>Multiplicity</b>                   | 8.7 (8.7)                            |
| <b>Completeness (%)</b>               | 97.72 (94.26)                        |
| <b>Mean I/sigma(I)</b>                | 9.57 (1.06)                          |
| <b>Wilson B-factor</b>                | 20.12                                |
| <b>R-merge</b>                        | 0.1267 (1.953)                       |
| <b>R-meas</b>                         | 0.1347 (2.078)                       |
| <b>R-pim</b>                          | 0.04516 (0.7)                        |
| <b>CC1/2</b>                          | 0.998 (0.528)                        |
| <b>CC*</b>                            | 1 (0.831)                            |
| <b>Reflections used in refinement</b> | 103433 (9962)                        |
| <b>Reflections used for R-free</b>    | 5140 (540)                           |
| <b>R-work</b>                         | 0.1636 (0.2770)                      |
| <b>R-free</b>                         | 0.1963 (0.3293)                      |
| <b>CC(work)</b>                       | 0.964 (0.813)                        |
| <b>CC(free)</b>                       | 0.961 (0.727)                        |
| <b>Number of non-hydrogen atoms</b>   | 6219                                 |
| <b>macromolecules</b>                 | 5610                                 |
| <b>ligands</b>                        | 140                                  |
| <b>solvent</b>                        | 469                                  |
| <b>Protein residues</b>               | 694                                  |
| <b>RMS(bonds)</b>                     | 0.013                                |
| <b>RMS(angles)</b>                    | 1.2                                  |
| <b>Ramachandran favored (%)</b>       | 98.26                                |
| <b>Ramachandran allowed (%)</b>       | 1.16                                 |
| <b>Ramachandran outliers (%)</b>      | 0.58                                 |
| <b>Rotamer outliers (%)</b>           | 0.31                                 |
| <b>Clashscore</b>                     | 6.24                                 |
| <b>Average B-factor</b>               | 33.14                                |
| <b>macromolecules</b>                 | 32.54                                |
| <b>ligands</b>                        | 51.77                                |
| <b>solvent</b>                        | 34.74                                |

353

354

355 **Supplementary Table 2**-Data collection and refinement statistics. Statistics for the highest  
356 resolution shell are shown in parentheses.

357

358 **Methods**

359

360 **SDS PAGE of E/S**

361 RPMI plus 500 IU/ml of penicillin and 500 µg/ml of streptomycin was used to culture adult  
362 *T. muris* and obtain E/S proteins. 1ml of culture medium was centrifuged at 19,000g to pellet  
363 eggs and then 10 µl was run on a NuPAGE 4-12% Bis-Tris gel (Life Sciences) at 200V using  
364 NuPAGE sample buffer and 0.05% v/v 2- mercaptoethanol and NuPAGE MES SDS running  
365 buffer. The sample was denatured at 95°C for 5 minutes before loading on to a gel with  
366 protein standards, LC5800 (Life Sciences). The gel was then stained for 1 hour using Instant  
367 Blue (Expedeon) and destained using distilled water. The gel was photographed using a  
368 digipad (Medline Scientific).

369 **Multi angle light scattering**

370 Multi-angle light scattering (MALS) was used to test the size, purity and oligomeric state of  
371 E/S and native p43. The proteins were passed down a Superdex 200 24/300 gel filtration  
372 column (GE healthcare) at a rate of 0.75 ml/minute in PBS buffer, pH7.4 using a NGC FPLC  
373 (Bio-Rad). The eluate passed through a Wyatt Helios 2 18-angle light scattering instrument  
374 and a rEX differential refractive index detector for accurate concentration detection using a  
375  $dn/dc$  value of 0.185 ml/g. The resulting scattering peaks were analyzed using ASTRA  
376 version 6.1 to determine the average mass across the eluted peaks.

377 **Tandem mass spectrometry**

378 Mucus samples were reduced for 3 hours at 37°C in 50 mM dithiothreitol (DTT; Melford  
379 Labs) and alkylated with 100mM idoactemide for 15 minutes at room temperature in the  
380 dark. Samples were spun in Vivaspin (Sartorius) 3kDa Molecular Weight cut off (MWCO)  
381 columns for 10 minutes at 14,000g for buffer exchange into 100 mM ammonium bicarbonate.  
382 5 µg of sequencing grade modified trypsin (Promega) was added to samples and incubated at  
383 37 °C overnight. Centrifugation in Vivaspin 10kDa MWCO columns was carried out on the



384 digested product, thereby retaining high molecular weight glycopeptides within the filter and  
385 tryptic peptides in the flow through. The peptides were acidified to pH 2 using 0.1% (v/v)  
386 formic acid, and recovered free of salt by reverse phase chromatography using a C-18 ZipTip  
387 (Millipore, Durham, UK). Zip-tips were pre-washed with 4 cycles 50% (V/V) acetonitrile,  
388 followed by 8 cycles 0.1 % (v/v) formic acid and loaded with the sample. The sample was  
389 passed through the resin tip repeatedly before washing with 0.1% (v/v) formic acid. Peptides  
390 were eluted in 50% (v/v) acetonitrile, dried in a vacuum centrifuge for 10 minutes and re  
391 suspended in 10  $\mu$ l 0.1 % (v/v) formic acid / 50 % (v/v) acetonitrile.

392  
393 Samples were analyzed by tandem mass spectrometry (MS/MS) using a NanoAcuity LC  
394 coupled to a LTQ Velos mass spectrometer. Results were searched using Mascot (Matrix  
395 Science UK) and searched against the *T. muris* proteome, version 2.1 (Sanger Centre 2013)  
396 and murine database (acquired from UniProt\_Murine). The following parameters were used  
397 for Mascot analysis: fixed modifications of carbamidomethyl-cysteine, variable modifications  
398 of methionine oxidation, peptide tolerance of 1.2Da, MS/MS tolerance of 0.6 Da, and peptide  
399 charge of 2+ and 3+. Following mascot analysis the resulting data were further analyzed  
400 using Scaffold (Proteome Software, Portland, OR) (version 4) using the following  
401 parameters: protein probability threshold of 80%, peptide probability threshold of 50% and  
402 minimum number of peptides 3.

#### 403 **L2, L3, L4 and adult *T. muris***

404 SCID mice were infected with 200 *T. muris* eggs and 2 mice were culled at day 14, day 21  
405 and day 35 p.i. The cecum and proximal colon were flushed through with PBS, 0.9% NaCl.  
406 The cecum and colon were incubated with 10 ml of PBS, NaCl at 37 °C for 2 hours with  
407 frequent shaking. Individual larvae of various stages were picked out and washed in PBS.  
408 They were frozen at -80°C until processed. At day 35 p.i., males and females were separated.  
409 Embryonated eggs are routinely kept in the fridge in the laboratory.

#### 410 **Real Time, semi-quantitative PCR**

411 RNA was extracted from different life cycle stages by maceration in Trizol (Life  
412 Technologies) with a FastPrep and lysing matrix D (MP Biomedical). 2 µg of RNA was used  
413 to synthesise RNA using GoScript reverse transcriptase (Promega) and a poly dT  
414 primer. Reverse transcriptase, Real Time, semi quantitative PCR was carried out using  
415 SensiFAST Sybr Hi-ROX (Bioline) and a StepOne Plus thermocycler (Applied  
416 Biosystems). 18S was used as a housekeeping gene and fold changes were calculated using  
417 the  $\Delta\Delta C_t$  method. The mean  $C_t$  of 3 technical replicates was used for each separate  
418 biological replicate (a pool of worms from an individual mouse).  $\Delta\Delta C_t$ s were then  
419 calculated for each biological replicate (n=3) and the SEM was then calculated. A reverse  
420 transcriptase negative control was also included. Primer sequences, 18S Forward 5'  
421 GTTTACGGTGACGAGGCAAT 3' and Reverse 5' TCACAACTAGGGGCGGTATC 3' and  
422 for 43 Forward 5' CAAAAGCACTGCATCGAGA 3' and Reverse 5'  
423 GTCGTAGACGTGGCTGACAA 3'.

#### 424 **Culturing *T. muris* with sodium azide**

425 10 female and 15 male adult *T. muris* worms were cultured overnight in RPMI plus 500  
426 IU/ml penicillin, 500 µg/ml streptomycin or with 10mM or 100mM sodium azide in a 24  
427 tissue culture plate. 10 µl of culture medium from each condition was run on SDS PAGE as  
428 previously described.

#### 429 **Biotinylated Glycosaminoglycan (GAG) ELISAs**

430 ELISA plates were coated with 5 µg/ml of either p43 or r43 in carbonate, bicarbonate buffer  
431 pH 9.6 and incubated at 4°C overnight. The next day plates were washed in PBS Tween 20,  
432 0.05% and excess antigen binding sites were blocked with PBS, 1% FCS for 1 hour at room  
433 temperature. After washing again, the plates were incubated in a range of biotinylated HS or  
434 chondroitin 4 sulfate for 1 hour, washed and incubated in streptavidin peroxidase and, after a

435 final wash, developed in 3,3',5,5'-Tetramethylbenzidine (TMB, Becton Dickinson Opt EIA™  
436 substrate, Catalog number, 555214). ELISA substrate. Plates were read on a VersaMax  
437 (Molecular Devices) and data analyzed by SoftMax Pro v 6.4.2

#### 438 **Immunostaining of bone marrow derived dendritic cells**

439 Bone marrow was collected from femurs and tibias of male BALB/c mice. Red blood cells  
440 were lysed with Ack buffer (150mM ammonium chloride (NH<sub>4</sub>Cl), 10mM potassium  
441 carbonate (KCO<sub>3</sub>), 0.1 mM Na<sub>2</sub>EDTA) and the remaining cells cultured at 2x10<sup>5</sup> cells/ml for 7  
442 days in RPMI 1640 plus 100 IU/ml penicillin and 100 µg/ml streptomycin with 50 µM β-  
443 mercaptoethanol (Sigma), 10% FCS (Gibco) and 40 ng/ml mouse GM-CSF (eBiosciences).  
444 Dendritic cells (DCs) were collected from culture plates and re-plated at 1x10<sup>5</sup> cells/ml onto  
445 poly-D lysine (Sigma-Aldrich UK) coated coverslips for 24h. Cells were then pulsed with 25  
446 µg/ml Cy3 (GE Healthcare) labeled p43 for 1hour, washed and fresh media added for 2 hours  
447 before being washed in PBS and fixed with paraformaldehyde (Sigma) for 15 minutes. DCs  
448 were permeabilized with 0.1% Triton X-100 (Sigma), blocked with goat serum and stained  
449 with rat anti-mouse H2M (BD Biosciences) at 1/1000 dilution with a goat anti-rat-AlexaFluor  
450 488 secondary (Invitrogen) before being mounted in Mowiol® 4-88 mounting medium with  
451 DAPI (Sigma-Aldrich UK). Images were acquired on an Olympus IX83 inverted microscope  
452 using Green Lumencor LED excitation, a 60x/ 1.42 Plan Apo objective and the Sedat filter  
453 set (Chroma 89000). The images were collected using a R6 (Qimaging) CCD camera with a  
454 Z optical spacing of 0.2µm. Raw images were then deconvolved using the Huygens Pro  
455 software (SVI) and maximum intensity projections of these deconvolved images obtained.

#### 456 **Bone marrow derived dendritic cells for flow cytometry**

457 Bone marrow was collected from femurs of C57BL/6 mice. Red blood cells were lysed and  
458 the remaining cells cultured at 2x10<sup>5</sup> cells/ml for 7 days in RPMI 1640 with 2mM L-  
459 glutamine, penicillin/streptomycin (all Sigma), 10% FCS (Gibco) and 20ng/ml mouse

460 Granulocyte Mast Cell-Colony Stimulating Factor (GM-CSF) (Biolegend). At day 3, a  
461 further 10ml of media containing 20 ng/ml of GMCS-F was added. At day 6, 8 and 9 culture  
462 supernatant was removed and replaced with 10ml of fresh culture medium containing  
463 20ng/ml GM-CSF. On day 10 GMDCs were collected from culture plates and cultured at 2 x  
464 10<sup>6</sup> cells in triplicate for 18 hours with 10, 50 or 100 µg/ml of p43. In experiments using  
465 lipopolysaccharide (LPS), 250 ng/ml of LPS was used and 25 µg/ml of *S. mansoni* egg  
466 antigen (SEA). CD11C APC<sup>+</sup> cells were stained for MHC II PE.Cy5 and CD86.A700.  
467 Samples were acquired using a 5 laser Fortessa with BD FACSDiva software and analyzed  
468 with FlowJo software (v9, Tree Star).

469

470

471

472

473 **Supplementary References**

474

- 475 1 Blaxter, M. & Koutsovoulos, G. The evolution of parasitism in Nematoda.  
476 *Parasitology* **142 Suppl 1**, S26-39, doi:10.1017/S0031182014000791 (2015).
- 477 2 Henikoff, S. & Henikoff, J. G. Amino acid substitution matrices from protein blocks.  
478 *Proc Natl Acad Sci U S A* **89**, 10915-10919 (1992).
- 479 3 Korhonen, P. K. *et al.* Phylogenomic and biogeographic reconstruction of the  
480 *Trichinella* complex. *Nat Commun* **7**, 10513, doi:10.1038/ncomms10513 (2016).
- 481

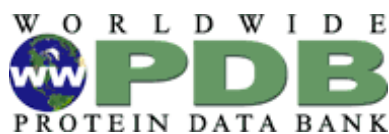

# Full wwPDB X-ray Structure Validation Report ⓘ

Jan 22, 2019 – 12:06 PM GMT

PDB ID : 6QIX  
Title : The crystal structure of Trichuris muris P43  
Deposited on : 2019-01-21  
Resolution : 1.65 Å(reported)

This is a Full wwPDB X-ray Structure Validation Report.

This report is produced by the wwPDB biocuration pipeline after annotation of the structure.

We welcome your comments at [validation@mail.wwpdb.org](mailto:validation@mail.wwpdb.org)

A user guide is available at

<https://www.wwpdb.org/validation/2017/XrayValidationReportHelp>

with specific help available everywhere you see the ⓘ symbol.

---

The following versions of software and data (see [references ⓘ](#)) were used in the production of this report:

MolProbity : 4.02b-467  
Mogul : 1.7.3 (157068), CSD as539be (2018)  
Xtrriage (Phenix) : 1.13  
EDS : **FAILED**  
Percentile statistics : 20171227.v01 (using entries in the PDB archive December 27th 2017)  
Ideal geometry (proteins) : Engh & Huber (2001)  
Ideal geometry (DNA, RNA) : Parkinson et al. (1996)  
Validation Pipeline (wwPDB-VP) : rb-20031633

# 1 Overall quality at a glance i

The following experimental techniques were used to determine the structure:

*X-RAY DIFFRACTION*

The reported resolution of this entry is 1.65 Å.

Percentile scores (ranging between 0-100) for global validation metrics of the entry are shown in the following graphic. The table shows the number of entries on which the scores are based.

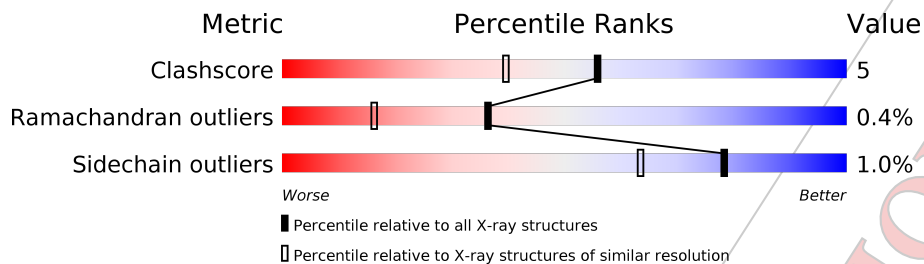

| Metric                | Whole archive<br>(#Entries) | Similar resolution<br>(#Entries, resolution range(Å)) |
|-----------------------|-----------------------------|-------------------------------------------------------|
| Clashscore            | 122126                      | 1616 (1.66-1.66)                                      |
| Ramachandran outliers | 120053                      | 1584 (1.66-1.66)                                      |
| Sidechain outliers    | 120020                      | 1584 (1.66-1.66)                                      |

The table below summarises the geometric issues observed across the polymeric chains and their fit to the electron density. The red, orange, yellow and green segments on the lower bar indicate the fraction of residues that contain outliers for  $\geq 3$ , 2, 1 and 0 types of geometric quality criteria. A grey segment represents the fraction of residues that are not modelled. The numeric value for each fraction is indicated below the corresponding segment, with a dot representing fractions  $\leq 5\%$

Note EDS failed to run properly.

| Mol | Chain | Length | Quality of chain |
|-----|-------|--------|------------------|
| 1   | A     | 394    | 79% 8% • 12%     |
| 1   | B     | 394    | 80% 7% • 12%     |

## 2 Entry composition i

There are 7 unique types of molecules in this entry. The entry contains 12036 atoms, of which 5527 are hydrogens and 0 are deuteriums.

In the tables below, the ZeroOcc column contains the number of atoms modelled with zero occupancy, the AltConf column contains the number of residues with at least one atom in alternate conformation and the Trace column contains the number of residues modelled with at most 2 atoms.

- Molecule 1 is a protein called Uncharacterized protein.

| Mol | Chain | Residues | Atoms |      |      |     |     | ZeroOcc | AltConf | Trace |   |
|-----|-------|----------|-------|------|------|-----|-----|---------|---------|-------|---|
|     |       |          | Total | C    | H    | N   | O   |         |         |       | S |
| 1   | A     | 347      | Total | C    | H    | N   | O   | S       | 0       | 9     | 0 |
|     |       |          | 5494  | 1776 | 2669 | 498 | 503 | 48      |         |       |   |
| 1   | B     | 347      | Total | C    | H    | N   | O   | S       | 0       | 6     | 0 |
|     |       |          | 5443  | 1762 | 2636 | 493 | 505 | 47      |         |       |   |

- Molecule 2 is N-ACETYL-D-GLUCOSAMINE (three-letter code: NAG) (formula:  $C_8H_{15}NO_6$ ).

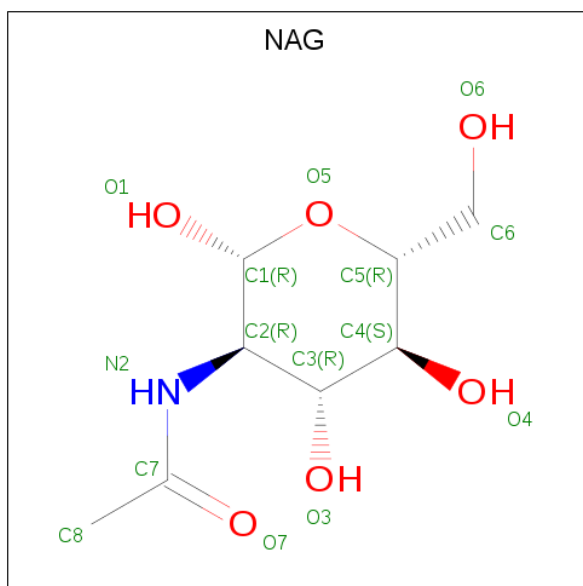

| Mol | Chain | Residues | Atoms |   |    |   |   | ZeroOcc | AltConf |
|-----|-------|----------|-------|---|----|---|---|---------|---------|
|     |       |          | Total | C | H  | N | O |         |         |
| 2   | A     | 1        | Total | C | H  | N | O | 0       | 0       |
|     |       |          | 28    | 8 | 14 | 1 | 5 |         |         |
| 2   | A     | 1        | Total | C | H  | N | O | 0       | 0       |
|     |       |          | 28    | 8 | 14 | 1 | 5 |         |         |
| 2   | B     | 1        | Total | C | H  | N | O | 0       | 0       |
|     |       |          | 28    | 8 | 14 | 1 | 5 |         |         |
| 2   | B     | 1        | Total | C | H  | N | O | 0       | 0       |
|     |       |          | 28    | 8 | 14 | 1 | 5 |         |         |



- Molecule 3 is ACETATE ION (three-letter code: ACT) (formula:  $C_2H_3O_2$ ).

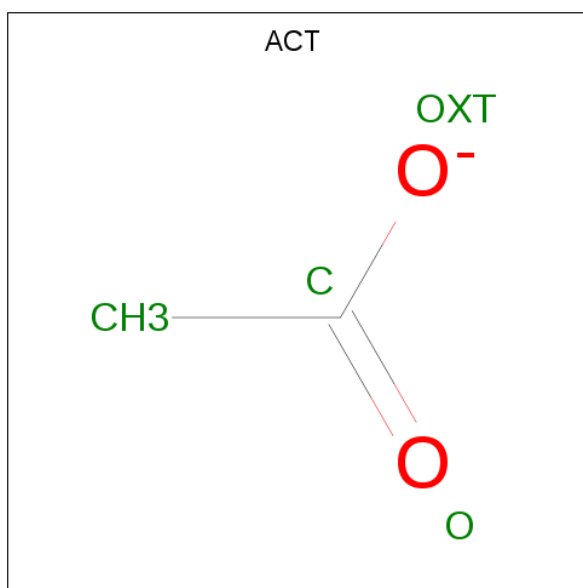

| Mol | Chain | Residues | Atoms |   |   |   | ZeroOcc | AltConf |   |
|-----|-------|----------|-------|---|---|---|---------|---------|---|
|     |       |          | Total | C | H | O |         |         |   |
| 3   | A     | 1        | Total | 7 | 2 | 3 | 2       | 0       | 0 |
| 3   | A     | 1        | Total | 7 | 2 | 3 | 2       | 0       | 0 |
| 3   | A     | 1        | Total | 7 | 2 | 3 | 2       | 0       | 0 |
| 3   | B     | 1        | Total | 7 | 2 | 3 | 2       | 0       | 0 |

- Molecule 4 is HEXAETHYLENE GLYCOL (three-letter code: P6G) (formula:  $C_{12}H_{26}O_7$ ).

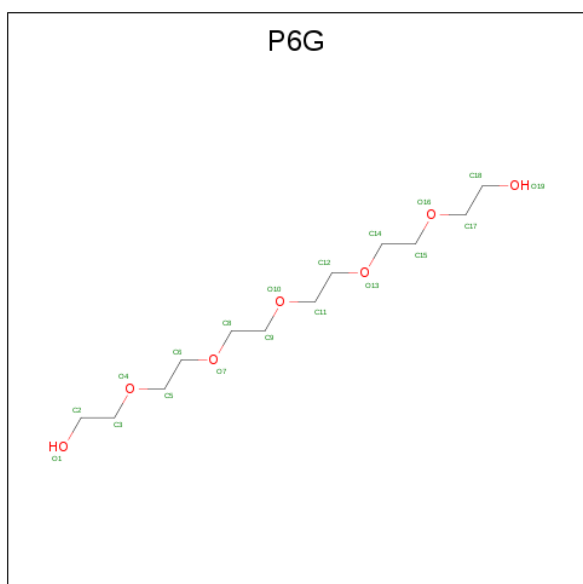

| Mol | Chain | Residues | Atoms |    |    |   | ZeroOcc | AltConf |
|-----|-------|----------|-------|----|----|---|---------|---------|
| 4   | A     | 1        | Total | C  | H  | O | 0       | 0       |
|     |       |          | 45    | 12 | 26 | 7 |         |         |
| 4   | A     | 1        | Total | C  | H  | O | 0       | 0       |
|     |       |          | 45    | 12 | 26 | 7 |         |         |
| 4   | B     | 1        | Total | C  | H  | O | 0       | 0       |
|     |       |          | 45    | 12 | 26 | 7 |         |         |
| 4   | B     | 1        | Total | C  | H  | O | 0       | 0       |
|     |       |          | 45    | 12 | 26 | 7 |         |         |

- Molecule 5 is CALCIUM ION (three-letter code: CA) (formula: Ca).

| Mol | Chain | Residues | Atoms |    | ZeroOcc | AltConf |
|-----|-------|----------|-------|----|---------|---------|
| 5   | A     | 1        | Total | Ca | 0       | 0       |
|     |       |          | 1     | 1  |         |         |

- Molecule 6 is DI(HYDROXYETHYL)ETHER (three-letter code: PEG) (formula: C<sub>4</sub>H<sub>10</sub>O<sub>3</sub>).

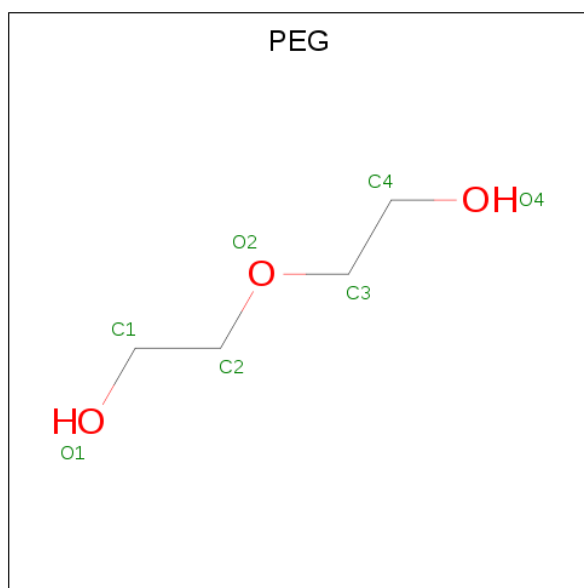

| Mol | Chain | Residues | Atoms |   |    |   | ZeroOcc | AltConf |
|-----|-------|----------|-------|---|----|---|---------|---------|
| 6   | A     | 1        | Total | C | H  | O | 0       | 0       |
|     |       |          | 17    | 4 | 10 | 3 |         |         |
| 6   | A     | 1        | Total | C | H  | O | 0       | 0       |
|     |       |          | 17    | 4 | 10 | 3 |         |         |
| 6   | B     | 1        | Total | C | H  | O | 0       | 0       |
|     |       |          | 17    | 4 | 10 | 3 |         |         |
| 6   | B     | 1        | Total | C | H  | O | 0       | 0       |
|     |       |          | 17    | 4 | 10 | 3 |         |         |
| 6   | B     | 1        | Total | C | H  | O | 0       | 0       |
|     |       |          | 17    | 4 | 10 | 3 |         |         |

- Molecule 7 is water.

| Mol | Chain | Residues | Atoms        |          | ZeroOcc | AltConf |
|-----|-------|----------|--------------|----------|---------|---------|
| 7   | A     | 333      | Total<br>333 | O<br>333 | 0       | 0       |
| 7   | B     | 360      | Total<br>360 | O<br>360 | 0       | 0       |

CONFIDENTIAL VALIDATION REPORT

### 3 Residue-property plots [\(i\)](#)

These plots are drawn for all protein, RNA and DNA chains in the entry. The first graphic for a chain summarises the proportions of the various outlier classes displayed in the second graphic. The second graphic shows the sequence view annotated by issues in geometry. Residues are color-coded according to the number of geometric quality criteria for which they contain at least one outlier: green = 0, yellow = 1, orange = 2 and red = 3 or more. Stretches of 2 or more consecutive residues without any outlier are shown as a green connector. Residues present in the sample, but not in the model, are shown in grey.

Note EDS failed to run properly.

- Molecule 1: Uncharacterized protein

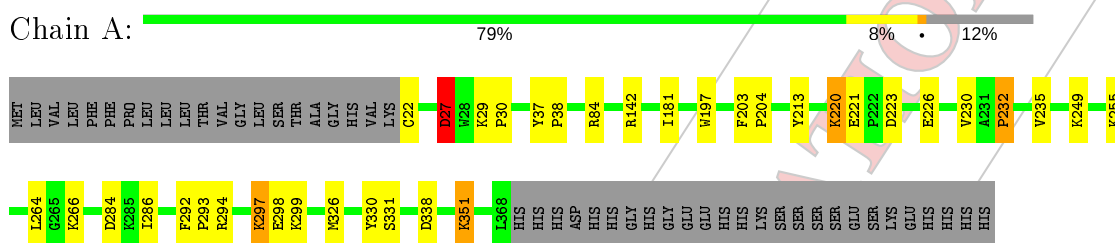

- Molecule 1: Uncharacterized protein

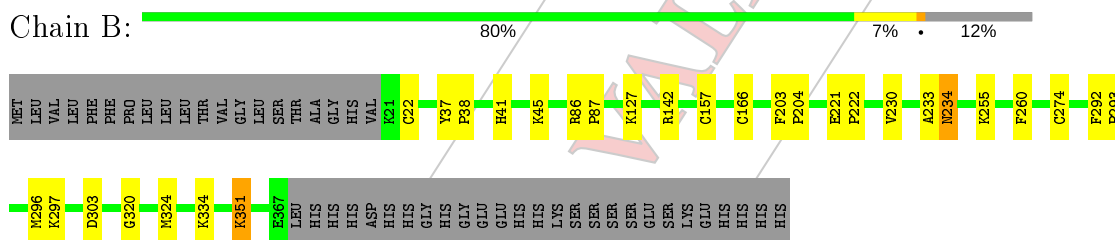

## 4 Data and refinement statistics i

EDS failed to run properly - this section is therefore incomplete.

| Property                                                 | Value                                                       | Source    |
|----------------------------------------------------------|-------------------------------------------------------------|-----------|
| Space group                                              | P 1 21 1                                                    | Depositor |
| Cell constants<br>a, b, c, $\alpha$ , $\beta$ , $\gamma$ | 47.68Å 164.83Å 61.17Å<br>90.00° 110.37° 90.00°              | Depositor |
| Resolution (Å)                                           | 57.34 – 1.65                                                | Depositor |
| % Data completeness<br>(in resolution range)             | 97.7 (57.34-1.65)                                           | Depositor |
| $R_{merge}$                                              | 0.13                                                        | Depositor |
| $R_{sym}$                                                | (Not available)                                             | Depositor |
| $\langle I/\sigma(I) \rangle$ <sup>1</sup>               | 0.88 (at 1.65Å)                                             | Xtrriage  |
| Refinement program                                       | PHENIX dev_3304                                             | Depositor |
| R, $R_{free}$                                            | 0.150 , 0.189                                               | Depositor |
| Wilson B-factor (Å <sup>2</sup> )                        | 17.3                                                        | Xtrriage  |
| Anisotropy                                               | 0.521                                                       | Xtrriage  |
| L-test for twinning <sup>2</sup>                         | $\langle  L  \rangle = 0.49$ , $\langle L^2 \rangle = 0.32$ | Xtrriage  |
| Estimated twinning fraction                              | 0.043 for h,-k,-h-l                                         | Xtrriage  |
| Total number of atoms                                    | 12036                                                       | wwPDB-VP  |
| Average B, all atoms (Å <sup>2</sup> )                   | 35.0                                                        | wwPDB-VP  |

Xtrriage's analysis on translational NCS is as follows: *The largest off-origin peak in the Patterson function is 5.10% of the height of the origin peak. No significant pseudotranslation is detected.*

<sup>1</sup> Intensities estimated from amplitudes.

<sup>2</sup> Theoretical values of  $\langle |L| \rangle$ ,  $\langle L^2 \rangle$  for acentric reflections are 0.5, 0.333 respectively for untwinned datasets, and 0.375, 0.2 for perfectly twinned datasets.

## 5 Model quality i

### 5.1 Standard geometry i

Bond lengths and bond angles in the following residue types are not validated in this section: CA, PEG, NAG, P6G, ACT

The Z score for a bond length (or angle) is the number of standard deviations the observed value is removed from the expected value. A bond length (or angle) with  $|Z| > 5$  is considered an outlier worth inspection. RMSZ is the root-mean-square of all Z scores of the bond lengths (or angles).

| Mol | Chain | Bond lengths |         | Bond angles |               |
|-----|-------|--------------|---------|-------------|---------------|
|     |       | RMSZ         | # Z  >5 | RMSZ        | # Z  >5       |
| 1   | A     | 0.61         | 0/2928  | 0.65        | 1/3954 (0.0%) |
| 1   | B     | 0.61         | 0/2901  | 0.71        | 2/3920 (0.1%) |
| All | All   | 0.61         | 0/5829  | 0.68        | 3/7874 (0.0%) |

Chiral center outliers are detected by calculating the chiral volume of a chiral center and verifying if the center is modelled as a planar moiety or with the opposite hand. A planarity outlier is detected by checking planarity of atoms in a peptide group, atoms in a mainchain group or atoms of a sidechain that are expected to be planar.

| Mol | Chain | #Chirality outliers | #Planarity outliers |
|-----|-------|---------------------|---------------------|
| 1   | A     | 0                   | 1                   |

There are no bond length outliers.

All (3) bond angle outliers are listed below:

| Mol | Chain | Res | Type | Atoms     | Z     | Observed(°) | Ideal(°) |
|-----|-------|-----|------|-----------|-------|-------------|----------|
| 1   | B     | 324 | MET  | CG-SD-CE  | 10.74 | 117.38      | 100.20   |
| 1   | A     | 264 | LEU  | CA-CB-CG  | 5.39  | 127.69      | 115.30   |
| 1   | B     | 142 | ARG  | NE-CZ-NH2 | -5.11 | 117.75      | 120.30   |

There are no chirality outliers.

All (1) planarity outliers are listed below:

| Mol | Chain | Res | Type | Group   |
|-----|-------|-----|------|---------|
| 1   | A     | 27  | ASP  | Peptide |

## 5.2 Too-close contacts [i](#)

In the following table, the Non-H and H(model) columns list the number of non-hydrogen atoms and hydrogen atoms in the chain respectively. The H(added) column lists the number of hydrogen atoms added and optimized by MolProbity. The Clashes column lists the number of clashes within the asymmetric unit, whereas Symm-Clashes lists symmetry related clashes.

| Mol | Chain | Non-H | H(model) | H(added) | Clashes | Symm-Clashes |
|-----|-------|-------|----------|----------|---------|--------------|
| 1   | A     | 2825  | 2669     | 2653     | 42      | 0            |
| 1   | B     | 2807  | 2636     | 2633     | 19      | 0            |
| 2   | A     | 28    | 28       | 26       | 4       | 0            |
| 2   | B     | 28    | 28       | 26       | 0       | 0            |
| 3   | A     | 12    | 9        | 9        | 0       | 0            |
| 3   | B     | 4     | 3        | 3        | 0       | 0            |
| 4   | A     | 38    | 52       | 52       | 4       | 0            |
| 4   | B     | 38    | 52       | 52       | 0       | 0            |
| 5   | A     | 1     | 0        | 0        | 0       | 0            |
| 6   | A     | 14    | 20       | 20       | 3       | 0            |
| 6   | B     | 21    | 30       | 30       | 0       | 0            |
| 7   | A     | 333   | 0        | 0        | 7       | 1            |
| 7   | B     | 360   | 0        | 0        | 4       | 2            |
| All | All   | 6509  | 5527     | 5504     | 62      | 2            |

The all-atom clashscore is defined as the number of clashes found per 1000 atoms (including hydrogen atoms). The all-atom clashscore for this structure is 5.

All (62) close contacts within the same asymmetric unit are listed below, sorted by their clash magnitude.

| Atom-1             | Atom-2          | Interatomic distance (Å) | Clash overlap (Å) |
|--------------------|-----------------|--------------------------|-------------------|
| 1:A:297:LYS:NZ     | 7:A:501:HOH:O   | 1.63                     | 1.23              |
| 1:B:303[B]:ASP:OD2 | 7:B:501:HOH:O   | 1.65                     | 1.12              |
| 1:A:286:ILE:HG21   | 2:A:406:NAG:H83 | 1.52                     | 0.89              |
| 1:B:22:CYS:SG      | 7:B:809:HOH:O   | 2.31                     | 0.89              |
| 1:A:351:LYS:HE2    | 1:A:351:LYS:H   | 1.46                     | 0.80              |
| 1:A:232:PRO:HG3    | 2:A:406:NAG:H81 | 1.64                     | 0.79              |
| 1:A:221:GLU:OE2    | 7:A:502:HOH:O   | 2.00                     | 0.79              |
| 1:B:37:TYR:HB3     | 1:B:38:PRO:HA   | 1.75                     | 0.68              |
| 1:B:41:HIS:NE2     | 1:B:45:LYS:HE2  | 2.10                     | 0.66              |
| 1:A:37:TYR:HB3     | 1:A:38:PRO:HA   | 1.76                     | 0.66              |
| 1:A:351:LYS:HE2    | 1:A:351:LYS:N   | 2.17                     | 0.59              |
| 1:B:127:LYS:NZ     | 7:B:502:HOH:O   | 2.36                     | 0.58              |
| 1:A:230:VAL:HG11   | 1:A:299:LYS:HG3 | 1.84                     | 0.58              |
| 1:A:330:TYR:CG     | 6:A:409:PEG:H12 | 2.39                     | 0.58              |

*Continued on next page...*

Continued from previous page...

| Atom-1              | Atom-2            | Interatomic distance (Å) | Clash overlap (Å) |
|---------------------|-------------------|--------------------------|-------------------|
| 1:B:233:ALA:O       | 1:B:234:ASN:CB    | 2.51                     | 0.58              |
| 1:A:293:PRO:O       | 4:A:403:P6G:H171  | 2.06                     | 0.56              |
| 1:A:331:SER:H       | 4:A:403:P6G:H181  | 1.71                     | 0.56              |
| 1:A:330:TYR:CD1     | 6:A:409:PEG:H12   | 2.41                     | 0.55              |
| 1:A:181[A]:ILE:HD11 | 7:A:831:HOH:O     | 2.05                     | 0.55              |
| 1:A:298:GLU:OE1     | 7:A:503:HOH:O     | 2.18                     | 0.54              |
| 2:A:406:NAG:H3      | 2:A:406:NAG:O7    | 2.08                     | 0.52              |
| 1:A:232:PRO:HD2     | 1:A:235:VAL:HG21  | 1.91                     | 0.52              |
| 1:A:286:ILE:CG2     | 2:A:406:NAG:H83   | 2.34                     | 0.52              |
| 1:A:213:TYR:OH      | 1:A:220:LYS:HE2   | 2.09                     | 0.52              |
| 1:B:334:LYS:NZ      | 1:B:351:LYS:HA    | 2.25                     | 0.52              |
| 1:A:255:LYS:NZ      | 7:A:510:HOH:O     | 2.42                     | 0.52              |
| 1:B:233:ALA:O       | 1:B:234:ASN:HB3   | 2.12                     | 0.50              |
| 1:A:29:LYS:HB3      | 1:A:30:PRO:HD2    | 1.94                     | 0.50              |
| 1:B:86:ARG:HB2      | 1:B:87:PRO:HD2    | 1.94                     | 0.50              |
| 1:A:330:TYR:HA      | 4:A:403:P6G:H181  | 1.94                     | 0.48              |
| 1:A:27:ASP:HA       | 1:A:84:ARG:CB     | 2.42                     | 0.48              |
| 1:B:157:CYS:SG      | 1:B:166[B]:CYS:SG | 3.06                     | 0.48              |
| 1:A:142:ARG:NH1     | 1:A:266:LYS:O     | 2.43                     | 0.48              |
| 1:A:297:LYS:HE3     | 1:A:330:TYR:HD1   | 1.78                     | 0.48              |
| 1:A:220:LYS:HE3     | 1:A:226:GLU:HB2   | 1.96                     | 0.47              |
| 1:A:294:ARG:HD3     | 1:A:298:GLU:OE2   | 2.14                     | 0.47              |
| 1:A:326:MET:SD      | 6:A:409:PEG:H32   | 2.55                     | 0.47              |
| 1:B:292:PHE:CG      | 1:B:293:PRO:HD3   | 2.50                     | 0.47              |
| 1:A:181[B]:ILE:HD12 | 1:A:181[B]:ILE:C  | 2.35                     | 0.47              |
| 1:A:22:CYS:N        | 7:A:516:HOH:O     | 2.48                     | 0.46              |
| 1:A:181[A]:ILE:CD1  | 7:A:831:HOH:O     | 2.64                     | 0.46              |
| 1:B:230:VAL:HG21    | 1:B:296:MET:O     | 2.16                     | 0.45              |
| 1:A:27:ASP:HA       | 1:A:84:ARG:HB3    | 1.98                     | 0.45              |
| 1:A:181[B]:ILE:HD12 | 1:A:181[B]:ILE:O  | 2.16                     | 0.45              |
| 1:A:230:VAL:HG11    | 1:A:299:LYS:CG    | 2.48                     | 0.44              |
| 1:B:221:GLU:OE2     | 1:B:255:LYS:HE3   | 2.17                     | 0.43              |
| 1:A:293:PRO:CB      | 1:A:331:SER:OG    | 2.66                     | 0.43              |
| 1:B:351:LYS:HB2     | 1:B:351:LYS:HE2   | 1.86                     | 0.43              |
| 1:B:260:PHE:CG      | 1:B:320:GLY:HA3   | 2.55                     | 0.42              |
| 1:A:338[A]:ASP:OD2  | 1:A:338[A]:ASP:N  | 2.48                     | 0.42              |
| 1:A:293:PRO:HB3     | 1:A:331:SER:OG    | 2.20                     | 0.41              |
| 1:B:203:PHE:HB3     | 1:B:204:PRO:HA    | 2.03                     | 0.41              |
| 1:B:221:GLU:HG3     | 1:B:222:PRO:HD2   | 2.01                     | 0.41              |
| 1:A:197:TRP:CE2     | 1:A:249:LYS:HE3   | 2.56                     | 0.41              |
| 1:A:203:PHE:HB3     | 1:A:204:PRO:HA    | 2.03                     | 0.41              |

Continued on next page...



Continued from previous page...

| Atom-1          | Atom-2           | Interatomic distance (Å) | Clash overlap (Å) |
|-----------------|------------------|--------------------------|-------------------|
| 1:B:297:LYS:NZ  | 7:B:515:HOH:O    | 2.53                     | 0.41              |
| 1:B:234:ASN:ND2 | 1:B:234:ASN:O    | 2.54                     | 0.41              |
| 1:A:292:PHE:N   | 1:A:293:PRO:CD   | 2.83                     | 0.41              |
| 1:A:331:SER:N   | 4:A:403:P6G:H181 | 2.33                     | 0.41              |
| 1:A:232:PRO:HB2 | 1:A:235:VAL:HG23 | 2.02                     | 0.40              |
| 1:A:221:GLU:HG2 | 1:A:223:ASP:OD2  | 2.21                     | 0.40              |

All (2) symmetry-related close contacts are listed below. The label for Atom-2 includes the symmetry operator and encoded unit-cell translations to be applied.

| Atom-1        | Atom-2               | Interatomic distance (Å) | Clash overlap (Å) |
|---------------|----------------------|--------------------------|-------------------|
| 7:A:687:HOH:O | 7:B:817:HOH:O[2_445] | 2.12                     | 0.08              |
| 7:B:614:HOH:O | 7:B:789:HOH:O[1_655] | 2.18                     | 0.02              |

## 5.3 Torsion angles [i](#)

### 5.3.1 Protein backbone [i](#)

In the following table, the Percentiles column shows the percent Ramachandran outliers of the chain as a percentile score with respect to all X-ray entries followed by that with respect to entries of similar resolution.

The Analysed column shows the number of residues for which the backbone conformation was analysed, and the total number of residues.

| Mol | Chain | Analysed      | Favoured  | Allowed | Outliers | Percentiles |
|-----|-------|---------------|-----------|---------|----------|-------------|
| 1   | A     | 354/394 (90%) | 346 (98%) | 6 (2%)  | 2 (1%)   | 27 8        |
| 1   | B     | 351/394 (89%) | 345 (98%) | 5 (1%)  | 1 (0%)   | 43 22       |
| All | All   | 705/788 (90%) | 691 (98%) | 11 (2%) | 3 (0%)   | 36 16       |

All (3) Ramachandran outliers are listed below:

| Mol | Chain | Res | Type |
|-----|-------|-----|------|
| 1   | B     | 234 | ASN  |
| 1   | A     | 27  | ASP  |
| 1   | A     | 232 | PRO  |

### 5.3.2 Protein sidechains [i](#)

In the following table, the Percentiles column shows the percent sidechain outliers of the chain as a percentile score with respect to all X-ray entries followed by that with respect to entries of similar resolution.

The Analysed column shows the number of residues for which the sidechain conformation was analysed, and the total number of residues.

| Mol | Chain | Analysed      | Rotameric | Outliers | Percentiles |    |
|-----|-------|---------------|-----------|----------|-------------|----|
| 1   | A     | 321/354 (91%) | 317 (99%) | 4 (1%)   | 74          | 55 |
| 1   | B     | 318/354 (90%) | 316 (99%) | 2 (1%)   | 87          | 78 |
| All | All   | 639/708 (90%) | 633 (99%) | 6 (1%)   | 78          | 67 |

All (6) residues with a non-rotameric sidechain are listed below:

| Mol | Chain | Res | Type |
|-----|-------|-----|------|
| 1   | A     | 27  | ASP  |
| 1   | A     | 220 | LYS  |
| 1   | A     | 297 | LYS  |
| 1   | A     | 351 | LYS  |
| 1   | B     | 274 | CYS  |
| 1   | B     | 351 | LYS  |

Some sidechains can be flipped to improve hydrogen bonding and reduce clashes. All (1) such sidechains are listed below:

| Mol | Chain | Res | Type |
|-----|-------|-----|------|
| 1   | B     | 234 | ASN  |

### 5.3.3 RNA [i](#)

There are no RNA molecules in this entry.

### 5.4 Non-standard residues in protein, DNA, RNA chains [i](#)

There are no non-standard protein/DNA/RNA residues in this entry.

### 5.5 Carbohydrates [i](#)

There are no carbohydrates in this entry.

## 5.6 Ligand geometry [i](#)

Of 18 ligands modelled in this entry, 1 is monoatomic - leaving 17 for Mogul analysis.

In the following table, the Counts columns list the number of bonds (or angles) for which Mogul statistics could be retrieved, the number of bonds (or angles) that are observed in the model and the number of bonds (or angles) that are defined in the Chemical Component Dictionary. The Link column lists molecule types, if any, to which the group is linked. The Z score for a bond length (or angle) is the number of standard deviations the observed value is removed from the expected value. A bond length (or angle) with  $|Z| > 2$  is considered an outlier worth inspection. RMSZ is the root-mean-square of all Z scores of the bond lengths (or angles).

| Mol | Type | Chain | Res | Link | Bond lengths |      |          | Bond angles |      |          |
|-----|------|-------|-----|------|--------------|------|----------|-------------|------|----------|
|     |      |       |     |      | Counts       | RMSZ | # Z  > 2 | Counts      | RMSZ | # Z  > 2 |
| 2   | NAG  | A     | 401 | 1    | 14,14,15     | 0.52 | 0        | 17,19,21    | 0.59 | 0        |
| 3   | ACT  | A     | 402 | -    | 1,3,3        | 4.75 | 1 (100%) | 0,3,3       | 0.00 | -        |
| 4   | P6G  | A     | 403 | -    | 18,18,18     | 0.57 | 0        | 17,17,17    | 0.49 | 0        |
| 4   | P6G  | A     | 404 | -    | 18,18,18     | 0.54 | 0        | 17,17,17    | 0.54 | 0        |
| 3   | ACT  | A     | 405 | -    | 1,3,3        | 4.60 | 1 (100%) | 0,3,3       | 0.00 | -        |
| 2   | NAG  | A     | 406 | 1    | 14,14,15     | 0.59 | 1 (7%)   | 17,19,21    | 0.71 | 1 (5%)   |
| 6   | PEG  | A     | 408 | -    | 6,6,6        | 0.49 | 0        | 5,5,5       | 0.38 | 0        |
| 6   | PEG  | A     | 409 | -    | 6,6,6        | 0.52 | 0        | 5,5,5       | 0.84 | 0        |
| 3   | ACT  | A     | 410 | -    | 1,3,3        | 6.57 | 1 (100%) | 0,3,3       | 0.00 | -        |
| 2   | NAG  | B     | 401 | 1    | 14,14,15     | 0.54 | 0        | 17,19,21    | 1.76 | 3 (17%)  |
| 4   | P6G  | B     | 402 | -    | 18,18,18     | 0.54 | 0        | 17,17,17    | 0.57 | 0        |
| 4   | P6G  | B     | 403 | -    | 18,18,18     | 0.54 | 0        | 17,17,17    | 0.57 | 0        |
| 2   | NAG  | B     | 404 | 1    | 14,14,15     | 0.86 | 1 (7%)   | 17,19,21    | 0.89 | 1 (5%)   |
| 6   | PEG  | B     | 405 | -    | 6,6,6        | 0.48 | 0        | 5,5,5       | 0.42 | 0        |
| 6   | PEG  | B     | 406 | -    | 6,6,6        | 0.57 | 0        | 5,5,5       | 0.67 | 0        |
| 6   | PEG  | B     | 407 | -    | 6,6,6        | 0.51 | 0        | 5,5,5       | 0.47 | 0        |
| 3   | ACT  | B     | 408 | -    | 1,3,3        | 7.55 | 1 (100%) | 0,3,3       | 0.00 | -        |

In the following table, the Chirals column lists the number of chiral outliers, the number of chiral centers analysed, the number of these observed in the model and the number defined in the Chemical Component Dictionary. Similar counts are reported in the Torsion and Rings columns. '-' means no outliers of that kind were identified.

| Mol | Type | Chain | Res | Link | Chirals | Torsions   | Rings   |
|-----|------|-------|-----|------|---------|------------|---------|
| 2   | NAG  | A     | 401 | 1    | -       | 0/6/23/26  | 0/1/1/1 |
| 3   | ACT  | A     | 402 | -    | -       | 0/0/0/0    | 0/0/0/0 |
| 4   | P6G  | A     | 403 | -    | -       | 0/16/16/16 | 0/0/0/0 |
| 4   | P6G  | A     | 404 | -    | -       | 0/16/16/16 | 0/0/0/0 |
| 3   | ACT  | A     | 405 | -    | -       | 0/0/0/0    | 0/0/0/0 |
| 2   | NAG  | A     | 406 | 1    | -       | 0/6/23/26  | 0/1/1/1 |

Continued on next page...

Continued from previous page...

| Mol | Type | Chain | Res | Link | Chirals | Torsions   | Rings   |
|-----|------|-------|-----|------|---------|------------|---------|
| 6   | PEG  | A     | 408 | -    | -       | 0/4/4/4    | 0/0/0/0 |
| 6   | PEG  | A     | 409 | -    | -       | 0/4/4/4    | 0/0/0/0 |
| 3   | ACT  | A     | 410 | -    | -       | 0/0/0/0    | 0/0/0/0 |
| 2   | NAG  | B     | 401 | 1    | -       | 0/6/23/26  | 0/1/1/1 |
| 4   | P6G  | B     | 402 | -    | -       | 0/16/16/16 | 0/0/0/0 |
| 4   | P6G  | B     | 403 | -    | -       | 0/16/16/16 | 0/0/0/0 |
| 2   | NAG  | B     | 404 | 1    | -       | 0/6/23/26  | 0/1/1/1 |
| 6   | PEG  | B     | 405 | -    | -       | 0/4/4/4    | 0/0/0/0 |
| 6   | PEG  | B     | 406 | -    | -       | 0/4/4/4    | 0/0/0/0 |
| 6   | PEG  | B     | 407 | -    | -       | 0/4/4/4    | 0/0/0/0 |
| 3   | ACT  | B     | 408 | -    | -       | 0/0/0/0    | 0/0/0/0 |

All (6) bond length outliers are listed below:

| Mol | Chain | Res | Type | Atoms | Z    | Observed(Å) | Ideal(Å) |
|-----|-------|-----|------|-------|------|-------------|----------|
| 2   | A     | 406 | NAG  | O5-C1 | 2.00 | 1.47        | 1.43     |
| 2   | B     | 404 | NAG  | O5-C1 | 3.00 | 1.48        | 1.43     |
| 3   | A     | 405 | ACT  | CH3-C | 4.60 | 1.54        | 1.48     |
| 3   | A     | 402 | ACT  | CH3-C | 4.75 | 1.54        | 1.48     |
| 3   | A     | 410 | ACT  | CH3-C | 6.57 | 1.57        | 1.48     |
| 3   | B     | 408 | ACT  | CH3-C | 7.55 | 1.58        | 1.48     |

All (5) bond angle outliers are listed below:

| Mol | Chain | Res | Type | Atoms    | Z    | Observed(°) | Ideal(°) |
|-----|-------|-----|------|----------|------|-------------|----------|
| 2   | B     | 401 | NAG  | C1-C2-N2 | 2.04 | 113.97      | 110.49   |
| 2   | B     | 401 | NAG  | C3-C4-C5 | 2.11 | 114.02      | 110.24   |
| 2   | A     | 406 | NAG  | C1-O5-C5 | 2.16 | 115.16      | 112.19   |
| 2   | B     | 404 | NAG  | C1-O5-C5 | 2.94 | 116.23      | 112.19   |
| 2   | B     | 401 | NAG  | C1-O5-C5 | 5.22 | 119.37      | 112.19   |

There are no chirality outliers.

There are no torsion outliers.

There are no ring outliers.

3 monomers are involved in 11 short contacts:

| Mol | Chain | Res | Type | Clashes | Symm-Clashes |
|-----|-------|-----|------|---------|--------------|
| 4   | A     | 403 | P6G  | 4       | 0            |
| 2   | A     | 406 | NAG  | 4       | 0            |
| 6   | A     | 409 | PEG  | 3       | 0            |

## 5.7 Other polymers [i](#)

There are no such residues in this entry.

## 5.8 Polymer linkage issues [i](#)

There are no chain breaks in this entry.

CONFIDENTIAL VALIDATION REPORT

## 6 Fit of model and data [i](#)

### 6.1 Protein, DNA and RNA chains [i](#)

EDS failed to run properly - this section is therefore empty.

### 6.2 Non-standard residues in protein, DNA, RNA chains [i](#)

EDS failed to run properly - this section is therefore empty.

### 6.3 Carbohydrates [i](#)

EDS failed to run properly - this section is therefore empty.

### 6.4 Ligands [i](#)

EDS failed to run properly - this section is therefore empty.

### 6.5 Other polymers [i](#)

EDS failed to run properly - this section is therefore empty.

CONFIDENTIAL

VALIDATION REPORT
